# Supplementary material for: Abnormal brain cholesterol homeostasis in Alzheimer’s disease—a targeted metabolomic and transcriptomic study
Source: PubMed Central journal article supplement (PMC8169871; doi:10.1038/s41514-021-00064-9), 2021-06-01
Supplement: 41514_2021_64_MOESM2_ESM.pdf [file 41514_2021_64_MOESM2_ESM.pdf]

**Supplementary Table 1. Cohort-specific associations between metabolite levels and disease status/ severity of AD pathology**

| Metabolite Name                               | BLSA          |              |               |               |              |               | ROS          |              |               |               |              |               |
|-----------------------------------------------|---------------|--------------|---------------|---------------|--------------|---------------|--------------|--------------|---------------|---------------|--------------|---------------|
|                                               | ITG           |              |               | MFG           |              |               | ITG          |              |               | MFG           |              |               |
|                                               | $\beta$       | p-value      | p-value (FDR) | $\beta$       | p-value      | p-value (FDR) | $\beta$      | p-value      | p-value (FDR) | $\beta$       | p-value      | p-value (FDR) |
| <b>Disease Status</b>                         |               |              |               |               |              |               |              |              |               |               |              |               |
| <b>De novo cholesterol biosynthesis</b>       |               |              |               |               |              |               |              |              |               |               |              |               |
| cholesterol                                   | -0.063        | 0.44         | 0.915         | -0.019        | 0.836        | 0.836         | 0.076        | 0.055        | 0.25          | 0.024         | 0.611        | 0.719         |
| lanosterol                                    | 0.016         | 0.915        | 0.915         | -0.204        | 0.133        | 0.332         | -0.127       | 0.183        | 0.25          | <b>-0.217</b> | <b>0.019</b> | <b>0.093</b>  |
| 24,25-dihydrolanosterol                       | -0.045        | 0.699        | 0.915         | 0.126         | 0.298        | 0.497         | 0.067        | 0.254        | 0.254         | -0.022        | 0.719        | 0.719         |
| 7-dehydrocholesterol                          | -0.387        | 0.172        | 0.86          | <b>-0.499</b> | <b>0.034</b> | <b>0.169</b>  | 0.391        | 0.14         | 0.25          | 0.512         | 0.101        | 0.189         |
| desmosterol                                   | -0.075        | 0.823        | 0.915         | 0.058         | 0.752        | 0.836         | -0.335       | 0.2          | 0.25          | -0.336        | 0.114        | 0.189         |
| <b>Cholesterol catabolism (enzymatic)</b>     |               |              |               |               |              |               |              |              |               |               |              |               |
| 27-hydroxycholesterol                         | 0.406         | 0.143        | 0.191         | 0.185         | 0.539        | 0.539         | 0.186        | 0.22         | 0.321         | <b>-0.345</b> | <b>0.049</b> | <b>0.065</b>  |
| 4 $\beta$ -hydroxycholesterol                 | 0.1           | 0.61         | 0.61          | 0.242         | 0.113        | 0.452         | 0.107        | 0.321        | 0.321         | -0.111        | 0.285        | 0.285         |
| 24S-hydroxycholesterol                        | <b>-0.236</b> | <b>0.022</b> | <b>0.089</b>  | 0.101         | 0.376        | 0.502         | -0.054       | 0.214        | 0.321         | <b>-0.15</b>  | <b>0.009</b> | <b>0.036</b>  |
| 7 $\alpha$ -hydroxycholesterol                | 0.23          | 0.124        | 0.191         | 0.145         | 0.371        | 0.502         | 0.097        | 0.308        | 0.321         | <b>-0.202</b> | <b>0.024</b> | <b>0.048</b>  |
| <b>Cholesterol catabolism (non-enzymatic)</b> |               |              |               |               |              |               |              |              |               |               |              |               |
| 5 $\alpha$ ,6 $\alpha$ -epoxycholesterol      | 0.096         | 0.561        | 0.561         | 0.134         | 0.383        | 0.66          | 0.157        | 0.14         | 0.159         | 0.067         | 0.421        | 0.526         |
| 5 $\alpha$ ,6 $\beta$ -dihydroxycholestanol   | 0.128         | 0.378        | 0.472         | 0.029         | 0.883        | 0.883         | <b>0.221</b> | <b>0.02</b>  | <b>0.054</b>  | <b>-0.229</b> | <b>0.016</b> | <b>0.039</b>  |
| 5 $\beta$ ,6 $\beta$ -epoxycholesterol        | 0.126         | 0.354        | 0.472         | 0.137         | 0.396        | 0.66          | 0.146        | 0.089        | 0.149         | 0.005         | 0.943        | 0.943         |
| 7-ketocholesterol                             | <b>0.282</b>  | <b>0.019</b> | <b>0.096</b>  | 0.073         | 0.563        | 0.704         | <b>0.22</b>  | <b>0.022</b> | <b>0.054</b>  | -0.123        | 0.113        | 0.188         |
| 7 $\beta$ -hydroxycholesterol                 | <b>0.338</b>  | <b>0.042</b> | <b>0.106</b>  | 0.278         | 0.233        | 0.66          | 0.129        | 0.159        | 0.159         | <b>-0.211</b> | <b>0.014</b> | <b>0.039</b>  |
| <b>CERAD</b>                                  |               |              |               |               |              |               |              |              |               |               |              |               |
| <b>De novo cholesterol biosynthesis</b>       |               |              |               |               |              |               |              |              |               |               |              |               |
| cholesterol                                   | -0.043        | 0.357        | 0.801         | -0.024        | 0.752        | 0.94          | 0.032        | 0.275        | 0.412         | 0.009         | 0.786        | 0.983         |
| lanosterol                                    | 0.004         | 0.969        | 0.969         | -0.119        | 0.258        | 0.634         | -0.069       | 0.261        | 0.412         | -0.097        | 0.136        | 0.227         |
| 24,25-dihydrolanosterol                       | -0.042        | 0.608        | 0.801         | 0.088         | 0.38         | 0.634         | 0.019        | 0.644        | 0.644         | -0.001        | 0.983        | 0.983         |
| 7-dehydrocholesterol                          | -0.305        | 0.136        | 0.68          | -0.307        | 0.082        | 0.411         | <b>0.488</b> | <b>0.01</b>  | <b>0.05</b>   | <b>0.559</b>  | <b>0.016</b> | <b>0.082</b>  |
| desmosterol                                   | -0.122        | 0.64         | 0.801         | 0.002         | 0.984        | 0.984         | -0.182       | 0.329        | 0.412         | -0.303        | 0.052        | 0.131         |
| <b>Cholesterol catabolism (enzymatic)</b>     |               |              |               |               |              |               |              |              |               |               |              |               |

|                                               |               |              |              |        |       |       |        |       |       |               |              |              |
|-----------------------------------------------|---------------|--------------|--------------|--------|-------|-------|--------|-------|-------|---------------|--------------|--------------|
| 27-hydroxycholesterol                         | 0.157         | 0.471        | 0.628        | -0.015 | 0.944 | 0.944 | 0.037  | 0.722 | 0.931 | -0.174        | 0.119        | 0.119        |
| 4 $\beta$ -hydroxycholesterol                 | 0.065         | 0.647        | 0.647        | 0.164  | 0.202 | 0.624 | -0.007 | 0.931 | 0.931 | <b>-0.186</b> | <b>0.007</b> | <b>0.029</b> |
| 24S-hydroxycholesterol                        | <b>-0.168</b> | <b>0.011</b> | <b>0.042</b> | 0.035  | 0.666 | 0.888 | -0.048 | 0.083 | 0.214 | -0.075        | 0.056        | 0.075        |
| 7 $\alpha$ -hydroxycholesterol                | 0.156         | 0.154        | 0.308        | 0.12   | 0.312 | 0.624 | 0.103  | 0.107 | 0.214 | <b>-0.128</b> | <b>0.019</b> | <b>0.037</b> |
| <b>Cholesterol catabolism (non-enzymatic)</b> |               |              |              |        |       |       |        |       |       |               |              |              |
| 5 $\alpha$ ,6 $\alpha$ -epoxycholesterol      | 0.05          | 0.695        | 0.699        | 0.106  | 0.357 | 0.649 | 0.096  | 0.262 | 0.262 | 0.006         | 0.927        | 0.927        |
| 5 $\alpha$ ,6 $\beta$ -dihydroxycholestanol   | 0.042         | 0.699        | 0.699        | -0.066 | 0.661 | 0.67  | 0.105  | 0.139 | 0.262 | -0.127        | 0.088        | 0.147        |
| 5 $\beta$ ,6 $\beta$ -epoxycholesterol        | 0.079         | 0.462        | 0.699        | 0.106  | 0.39  | 0.649 | 0.079  | 0.254 | 0.262 | -0.03         | 0.593        | 0.741        |
| 7-ketocholesterol                             | 0.152         | 0.086        | 0.216        | 0.036  | 0.67  | 0.67  | 0.138  | 0.051 | 0.253 | <b>-0.111</b> | <b>0.038</b> | <b>0.094</b> |
| 7 $\beta$ -hydroxycholesterol                 | 0.222         | 0.08         | 0.216        | 0.236  | 0.201 | 0.649 | 0.091  | 0.185 | 0.262 | <b>-0.14</b>  | <b>0.019</b> | <b>0.094</b> |

## Braak

### De novo cholesterol biosynthesis

|                         |        |       |       |        |       |       |               |              |              |               |              |              |
|-------------------------|--------|-------|-------|--------|-------|-------|---------------|--------------|--------------|---------------|--------------|--------------|
| cholesterol             | 0.001  | 0.973 | 0.973 | 0.03   | 0.631 | 0.706 | 0.044         | 0.118        | 0.227        | 0.051         | 0.071        | 0.118        |
| lanosterol              | -0.014 | 0.867 | 0.973 | -0.128 | 0.121 | 0.303 | <b>-0.169</b> | <b>0.003</b> | <b>0.013</b> | <b>-0.161</b> | <b>0.014</b> | <b>0.069</b> |
| 24,25-dihydrolanosterol | -0.029 | 0.569 | 0.973 | 0.028  | 0.706 | 0.706 | -0.05         | 0.2          | 0.227        | -0.019        | 0.653        | 0.653        |
| 7-dehydrocholesterol    | -0.011 | 0.913 | 0.973 | -0.126 | 0.186 | 0.31  | 0.249         | 0.157        | 0.227        | 0.143         | 0.532        | 0.653        |
| desmosterol             | 0.33   | 0.192 | 0.96  | 0.2    | 0.025 | 0.126 | -0.161        | 0.227        | 0.227        | -0.204        | 0.069        | 0.118        |

### Cholesterol catabolism (enzymatic)

|                                |               |              |             |        |       |       |               |              |              |               |              |             |
|--------------------------------|---------------|--------------|-------------|--------|-------|-------|---------------|--------------|--------------|---------------|--------------|-------------|
| 27-hydroxycholesterol          | 0.015         | 0.937        | 0.937       | -0.139 | 0.493 | 0.564 | 0.131         | 0.216        | 0.432        | -0.057        | 0.595        | 0.793       |
| 4 $\beta$ -hydroxycholesterol  | 0.029         | 0.757        | 0.937       | 0.072  | 0.436 | 0.564 | -0.013        | 0.819        | 0.819        | -0.014        | 0.857        | 0.857       |
| 24S-hydroxycholesterol         | <b>-0.112</b> | <b>0.033</b> | <b>0.13</b> | -0.065 | 0.318 | 0.564 | <b>-0.064</b> | <b>0.038</b> | <b>0.152</b> | -0.079        | 0.1          | 0.2         |
| 7 $\alpha$ -hydroxycholesterol | 0.01          | 0.92         | 0.937       | -0.057 | 0.564 | 0.564 | -0.02         | 0.806        | 0.819        | <b>-0.132</b> | <b>0.032</b> | <b>0.13</b> |

### Cholesterol catabolism (non-enzymatic)

|                                             |        |       |       |        |       |       |              |              |              |        |       |       |
|---------------------------------------------|--------|-------|-------|--------|-------|-------|--------------|--------------|--------------|--------|-------|-------|
| 5 $\alpha$ ,6 $\alpha$ -epoxycholesterol    | -0.009 | 0.925 | 0.989 | 0.004  | 0.96  | 0.96  | 0.092        | 0.27         | 0.45         | 0.024  | 0.732 | 0.915 |
| 5 $\alpha$ ,6 $\beta$ -dihydroxycholestanol | -0.001 | 0.989 | 0.989 | -0.125 | 0.3   | 0.928 | <b>0.094</b> | <b>0.048</b> | <b>0.242</b> | -0.087 | 0.094 | 0.245 |
| 5 $\beta$ ,6 $\beta$ -epoxycholesterol      | 0.014  | 0.869 | 0.989 | -0.037 | 0.712 | 0.928 | 0.076        | 0.263        | 0.45         | -0.001 | 0.989 | 0.989 |
| 7-ketocholesterol                           | 0.044  | 0.585 | 0.989 | -0.029 | 0.67  | 0.928 | 0.072        | 0.398        | 0.498        | -0.057 | 0.392 | 0.653 |
| 7 $\beta$ -hydroxycholesterol               | 0.035  | 0.76  | 0.989 | -0.05  | 0.742 | 0.928 | 0.01         | 0.896        | 0.896        | -0.13  | 0.098 | 0.245 |

Inferior Temporal Gyrus (ITG); Middle Frontal Gyrus (MFG); False Discovery Rate (FDR); Baltimore Longitudinal Study on Aging (BLSA); Religious Orders Study (ROS);  $p < 0.05$  in bold

Negative coefficients indicate that lower metabolite concentration is significantly associated with AD, higher neuritic plaque burden (CERAD score), or higher neurofibrillary tangle pathology (Braak score). Positive coefficients indicate that higher metabolite concentration is significantly associated with AD, higher neuritic plaque burden (CERAD score), or higher neurofibrillary tangle pathology (Braak score). Metabolite categories are indicated in bold. BLSA sample size: AD (n=15), CN (n=8); ROS sample size: AD (n=31), CN (n=22).

**Supplementary Table 2. Differential expression (AD versus CN) of genes regulating *de novo* cholesterol biosynthesis, enzymatic catabolism and esterification within the entorhinal cortex, hippocampus and visual cortex**

| Gene                                      | entorhinal cortex |               | hippocampus     |               | visual cortex   |               |
|-------------------------------------------|-------------------|---------------|-----------------|---------------|-----------------|---------------|
|                                           | log fold-change   | P-value (FDR) | log fold-change | P-value (FDR) | log fold-change | P-value (FDR) |
| <b>De novo Cholesterol biosynthesis</b>   |                   |               |                 |               |                 |               |
| ACAT1                                     | 0.072             | 0.440         | -0.104          | 0.229         | -0.165          | 0.280         |
| ACAT2                                     | -0.349            | <b>0.008</b>  | -0.665          | <b>0.000</b>  | -0.457          | 0.183         |
| CYP51A1                                   | -0.216            | 0.069         | 0.064           | 0.606         | -0.562          | 0.054         |
| DHCR24                                    | -0.599            | <b>0.003</b>  | -0.878          | <b>0.000</b>  | -0.574          | 0.117         |
| DHCR7                                     | -0.040            | 0.649         | -0.179          | 0.054         | 0.130           | 0.416         |
| FDFT1                                     | -0.081            | 0.510         | -0.045          | 0.683         | -0.078          | 0.710         |
| FDPS                                      | -0.301            | <b>0.044</b>  | -0.376          | <b>0.002</b>  | -0.641          | 0.082         |
| GGPPS1                                    | -0.067            | 0.435         | -0.026          | 0.717         | -0.149          | 0.436         |
| HMGCR                                     | -0.474            | <b>0.044</b>  | -0.702          | <b>0.000</b>  | -0.846          | 0.065         |
| HMGCS1                                    | -0.256            | 0.160         | -0.447          | <b>0.000</b>  | -0.202          | 0.330         |
| IDI1                                      | -0.235            | <b>0.002</b>  | -0.307          | <b>0.000</b>  | -0.271          | 0.144         |
| IDI2                                      | -0.122            | 0.110         | 0.108           | 0.141         | 0.288           | 0.148         |
| LSS                                       | 0.171             | 0.173         | 0.228           | <b>0.038</b>  | 0.250           | 0.227         |
| MVD                                       | -0.118            | 0.226         | -0.194          | <b>0.003</b>  | 0.128           | 0.644         |
| MVK                                       | 0.045             | 0.538         | 0.078           | 0.128         | 0.192           | 0.289         |
| PMVK                                      | 0.045             | 0.700         | -0.142          | 0.214         | 0.025           | 0.921         |
| SC4MOL                                    | -0.402            | 0.068         | -0.192          | 0.145         | -0.454          | 0.086         |
| SC5D                                      | -0.217            | 0.089         | -0.156          | 0.219         | -0.618          | 0.066         |
| SQLE                                      | -0.182            | 0.082         | -0.161          | 0.117         | -0.318          | 0.096         |
| TM7SF2                                    | -0.510            | <b>0.000</b>  | -0.451          | <b>0.000</b>  | -0.232          | 0.174         |
| <b>Cholesterol catabolism (enzymatic)</b> |                   |               |                 |               |                 |               |
| CH25H                                     | 0.329             | 0.061         | 0.152           | 0.621         | -0.549          | 0.105         |
| CYP11A1                                   | 0.006             | 0.960         | 0.253           | <b>0.019</b>  | 0.200           | 0.436         |
| CYP27A1                                   | 0.282             | 0.077         | 0.209           | 0.122         | 0.229           | 0.305         |
| CYP39A1                                   | 0.106             | 0.174         | 0.143           | 0.159         | 0.389           | 0.074         |
| CYP3A4                                    | 0.226             | <b>0.024</b>  | 0.167           | <b>0.027</b>  | 0.332           | 0.179         |
| CYP46A1                                   | -0.640            | <b>0.000</b>  | 0.080           | 0.649         | 0.270           | 0.115         |
| CYP7A1                                    | -0.036            | 0.636         | -0.157          | <b>0.038</b>  | 0.263           | 0.134         |
| CYP7B1                                    | 0.099             | 0.396         | -0.111          | 0.363         | -0.103          | 0.409         |
| CYP8B1                                    | 0.137             | 0.125         | 0.041           | 0.604         | 0.273           | 0.177         |
| HSD3B7                                    | -0.036            | 0.777         | 0.217           | <b>0.011</b>  | 0.255           | 0.187         |
| <b>Cholesterol Esterification</b>         |                   |               |                 |               |                 |               |
| SOAT1                                     | 0.241             | <b>0.001</b>  | 0.121           | 0.157         | 0.211           | 0.129         |

False Discovery Rate (FDR)

Summary of genes differentially expressed in selected brain regions in AD compared to control (CN) across three pathways (de novo cholesterol biosynthesis, cholesterol catabolism (enzymatic) and cholesterol

esterification). P-values indicated in bold were significant at FDR-corrected p-value < 0.05. Metabolite categories are indicated in bold. Gene Expression Omnibus (GEO) data sample size: ERC: AD (n=25), CN (n=52); hippocampus: AD (n=29), CN (n=56); visual cortex: AD (n=18), CN (n=12).

**Supplementary Table 3. Differential expression (PD versus CN) of genes regulating *de novo* cholesterol biosynthesis, enzymatic catabolism and esterification within the substantia nigra**

| Gene                                      | substantia nigra |               |
|-------------------------------------------|------------------|---------------|
|                                           | log fold-change  | P-value (FDR) |
| <b>De novo Cholesterol biosynthesis</b>   |                  |               |
| DHCR24                                    | 0.313            | 0.609         |
| TM7SF2                                    | -0.034           | 0.816         |
| HMGCR                                     | -0.481           | 0.210         |
| ACAT2                                     | -0.483           | 0.210         |
| FDPS                                      | -0.479           | 0.457         |
| HMGCS1                                    | -0.510           | 0.210         |
| IDI1                                      | -0.654           | 0.210         |
| MVD                                       | 0.225            | 0.416         |
| LSS                                       | 0.022            | 0.816         |
| <b>Cholesterol catabolism (enzymatic)</b> |                  |               |
| CYP7A1                                    | 0.104            | 0.694         |
| CYP46A1                                   | 0.125            | 0.694         |
| HSD3B7                                    | 0.365            | 0.349         |
| CYP11A1                                   | 0.158            | 0.250         |
| CYP3A4                                    | 0.249            | 0.250         |
| <b>Cholesterol esterification</b>         |                  |               |
| SOAT1                                     | -0.087           | 0.609         |

**False Discovery Rate (FDR)**

Summary of genes differentially expressed in the substantia nigra in PD compared to control (CN) across three pathways (de novo cholesterol biosynthesis, cholesterol catabolism (enzymatic) and cholesterol esterification). Genes included were those significantly different in AD compared to CN. Note: there were no genes that were significantly different between PD compared to CN at an FDR-corrected p-value < 0.05. Metabolite categories are indicated in bold. Gene Expression Omnibus (GEO) data sample size: substantia nigra: PD (n=21), CN (n=26).

**Supplementary Table 4. iMAT-based metabolic network modeling of cholesterol synthesis and catabolism in AD**

[see xls doc]

**Supplementary Table 5. iMAT-based metabolic network modeling of cholesterol synthesis and catabolism in PD**

Substantia Nigra

| Gene                                                                                                                                 | Human-GEM rxn ID              | GEM Reaction                                                                                                                                                          | Odds Ratio | P-value |
|--------------------------------------------------------------------------------------------------------------------------------------|-------------------------------|-----------------------------------------------------------------------------------------------------------------------------------------------------------------------|------------|---------|
| <b><i>De novo</i> Cholesterol Biosynthesis (pre-squalene mevalonate pathway)</b>                                                     |                               |                                                                                                                                                                       |            |         |
| ACAT2                                                                                                                                | <a href="#">HMR_1434</a>      | acetoacetyl-CoA[c] + CoA[c] <=> 2 acetyl-CoA[c]                                                                                                                       | 0.921      | 1.000   |
| HMGCS                                                                                                                                | <a href="#">HMR_1437</a>      | acetoacetyl-CoA[c] + acetyl-CoA[c] + H <sub>2</sub> O[c] => CoA[c] + H <sup>+</sup> [c] + HMG-CoA[c]                                                                  | 1.833      | 0.375   |
| HMGCR                                                                                                                                | <a href="#">HMR_1440</a>      | 2 H <sup>+</sup> [c] + HMG-CoA[c] + 2 NADPH[c] => (R)-mevalonate[c] + CoA[c] + 2 NADP <sup>+</sup> [c]                                                                | 0.750      | 0.770   |
| <b><i>De novo</i> Cholesterol Biosynthesis (post-squalene mevalonate pathway including the Bloch and Kandutsch-Russell pathways)</b> |                               |                                                                                                                                                                       |            |         |
| SC5D                                                                                                                                 | <a href="#">7DHCHSTEROLtr</a> | 7-dehydrocholesterol[r] <=> 7-dehydrocholesterol[c]                                                                                                                   | 1.392      | 0.767   |
| DHCR7                                                                                                                                | <a href="#">HMR_1565</a>      | H <sup>+</sup> [c] + NADPH[c] + 7-dehydrocholesterol[c] => cholesterol[c] + NADP <sup>+</sup> [c]                                                                     | 0.909      | 1.000   |
| DHCR7                                                                                                                                | <a href="#">DHCR72r</a>       | H <sup>+</sup> [r] + NADPH[r] + 7-dehydrocholesterol[r] => cholesterol[r] + NADP <sup>+</sup> [r]                                                                     | 1.239      | 0.773   |
| SC4MOL<br>, SC5D                                                                                                                     | <a href="#">C14STRr</a>       | H <sup>+</sup> [r] + NADPH[r] + 4,4-dimethyl-5alpha-cholesta-8,14,24-trien-3beta-ol[r] => NADP <sup>+</sup> [r] + 14-demethyl lanosterol[r]                           | 0.285      | 0.159   |
| SC4MOL                                                                                                                               | <a href="#">C4STMO2Pr</a>     | NADP <sup>+</sup> [r] + O <sub>2</sub> [r] + 3-keto-4-methylzymosterol[r] => CO <sub>2</sub> [r] + H <sup>+</sup> [r] + NADPH[r] + zymosterol Intermediate 2[r]       | 0.703      | 0.746   |
| SC5D                                                                                                                                 | <a href="#">HMR_1516</a>      | 5alpha-cholesta-7,24-dien-3beta-ol[c] + H <sup>+</sup> [c] + NADPH[c] + O <sub>2</sub> [c] => 7-dehydrodesmosterol[c] + 2 H <sub>2</sub> O[c] + NADP <sup>+</sup> [c] | 1.060      | 1.000   |
| SC5D                                                                                                                                 | <a href="#">LSTO1r</a>        | H <sup>+</sup> [r] + NADPH[r] + O <sub>2</sub> [r] + 5alpha-cholesta-7,24-dien-3beta-ol[r] => 2 H <sub>2</sub> O[r] + NADP <sup>+</sup> [r] + 7-dehydrodesmosterol[r] | 2.850      | 0.268   |
| DHCR7                                                                                                                                | <a href="#">HMR_1519</a>      | 7-dehydrodesmosterol[c] + H <sup>+</sup> [c] + NADPH[c] => desmosterol[c] + NADP <sup>+</sup> [c]                                                                     | 1.060      | 1.000   |
| DHCR7                                                                                                                                | <a href="#">DHCR71r</a>       | H <sup>+</sup> [r] + NADPH[r] + 7-dehydrodesmosterol[r] => NADP <sup>+</sup> [r] + desmosterol[r]                                                                     | 2.850      | 0.268   |
| DHCR24                                                                                                                               | <a href="#">HMR_1526</a>      | desmosterol[c] + H <sup>+</sup> [c] + NADPH[c] => cholesterol[c] + NADP <sup>+</sup> [c]                                                                              | 1.275      | 1.000   |
| DHCR24                                                                                                                               | <a href="#">DSREDUCr</a>      | H <sup>+</sup> [r] + NADPH[r] + desmosterol[r] => cholesterol[r] + NADP <sup>+</sup> [r]                                                                              | 1.275      | 1.000   |
| DHCR24                                                                                                                               | <a href="#">DSMSTEROLtr</a>   | desmosterol[r] => desmosterol[c]                                                                                                                                      | 2.600      | 0.146   |
| <b>Cholesterol Catabolism (enzymatic)</b>                                                                                            |                               |                                                                                                                                                                       |            |         |
| HSD3B7                                                                                                                               | <a href="#">HMR_1738</a>      | cholest-5-ene-3beta,7alpha,24(S)-triol[c] + NAD <sup>+</sup> [c] => 4-cholesten-7alpha,24(S)-diol-3-one[c] + H <sup>+</sup> [c] + NADH[c]                             | 0.000      | 0.446   |

GEM: genome-scale metabolic model; Human-GEM rxn ID: Human-GEM reaction ID is searchable in [metabolicatlas.org](http://metabolicatlas.org) and indicates the specific reaction equation and additional reaction details; PD: Parkinson's disease; CN: Control; [c]: cytoplasm; [m]: mitochondria; [r]: endoplasmic reticulum;



Significant ( $p < 0.05$ ) odds ratios less than 1.0 indicate that the reaction is less active in PD compared to CN; significant odds ratios greater than 1.0 indicate that the reaction more active in PD compared to CN. Note: this analysis was restricted to the 16 reactions predicated by iMAT to be altered in AD compared to CN samples (see Table 3); none of these reactions was significantly different between PD compared to CN in the substantia nigra. GEM reaction categories are indicated in bold. Gene Expression Omnibus (GEO) data sample size: substantia nigra: PD (n=21), CN (n=26).

**Supplementary Table 6. Quantitation ranges (calibrator 1-7) in  $\mu\text{M}$** 

| metabolite                                  | cal 1 | cal 2  | cal 3 | cal 4 | cal 5 | cal 6 | cal 7  |
|---------------------------------------------|-------|--------|-------|-------|-------|-------|--------|
| cholesterol                                 | 50    | 125    | 500   | 1000  | 2000  | 5000  | 10.000 |
| lanosterol                                  | 0.040 | 0.100  | 0.398 | 0.746 | 1.491 | 3.728 | 7.455  |
| 24,25-dihydrolanosterol                     | 0.030 | 0.075  | 0.302 | 0.754 | 1.509 | 3.772 | 7.545  |
| 7-dehydrocholesterol                        | 0.01  | 0.025  | 0.1   | 1     | 2     | 5     | 10     |
| desmosterol                                 | 0.1   | 0.25   | 1     | 2     | 4     | 10    | 20     |
| 27-hydroxycholesterol                       | 0.01  | 0.025  | 0.1   | 0.2   | 0.4   | 1     | 2      |
| 4 $\beta$ -hydroxycholesterol               | 0.01  | 0.025  | 0.1   | 0.4   | 0.8   | 2     | 4      |
| 24S-hydroxycholesterol                      | 0.01  | 0.025  | 0.1   | 0.2   | 0.4   | 1     | 2      |
| 7 $\alpha$ -hydroxycholesterol              | 0.01  | 0.025  | 0.1   | 0.5   | 1     | 2.5   | 5      |
| 5 $\alpha$ ,6 $\alpha$ -epoxycholesterol    | 0.004 | 0.011  | 0.044 | 0.174 | 0.349 | 0.872 | 1.743  |
| 5 $\alpha$ ,6 $\beta$ -dihydroxycholestanol | 0.005 | 0.014  | 0.055 | 0.219 | 0.438 | 1.094 | 2.189  |
| 5 $\beta$ 6 $\beta$ -epoxycholesterol       | 0.006 | 0.014  | 0.056 | 0.226 | 0.451 | 1.128 | 2.257  |
| 7-ketocholesterol                           | 0.005 | 0.0125 | 0.05  | 0.5   | 1     | 2.5   | 5      |
| 7 $\beta$ -hydroxycholesterol               | 0.01  | 0.025  | 0.1   | 0.5   | 1     | 2.5   | 5      |

cal: calibrator

**Supplementary Table 7. Percentage of missing values (i.e. < LOD) across cholesterol biosynthesis and catabolism metabolites**

|                                             | <b>Brain region</b> |            |
|---------------------------------------------|---------------------|------------|
|                                             | <b>ITG</b>          | <b>MFG</b> |
| cholesterol                                 | 0                   | 0          |
| lanosterol                                  | 0                   | 0          |
| 24,25-dihydrolanosterol                     | 0                   | 0          |
| 7-dehydrocholesterol                        | 9                   | 14.14      |
| desmosterol                                 | 4                   | 2.02       |
| 27-hydroxycholesterol                       | 0                   | 0          |
| 4 $\beta$ -hydroxycholesterol               | 1                   | 0          |
| 24S-hydroxycholesterol                      | 0                   | 0          |
| 7 $\alpha$ -hydroxycholesterol              | 0                   | 0          |
| 5 $\alpha$ ,6 $\alpha$ -epoxycholesterol    | 0                   | 0          |
| 5 $\alpha$ ,6 $\beta$ -dihydroxycholestanol | 3                   | 4.04       |
| 5 $\beta$ ,6 $\beta$ -epoxycholesterol      | 0                   | 0          |
| 7-ketocholesterol                           | 0                   | 0          |
| 7 $\beta$ -hydroxycholesterol               | 0                   | 0          |
| *22R-hydroxycholesterol                     | 68                  | 71.72      |
| *24,25-epoxycholesterol                     | 51                  | 62.63      |
| *25-hydroxycholesterol                      | 100                 | 100        |
| *7 $\alpha$ -hydroxycholestenone            | 76                  | 78.79      |

ITG: inferior temporal gyrus; MFG: middle frontal gyrus; LOD: limit of detection

Metabolites that were above the 30% missing threshold were not included in analyses and indicated with an \*. Values for metabolites that were < LOD and below the 30% missing threshold (i.e. metabolites that are not indicated with an \*) were imputed. Baltimore Longitudinal Study on Aging (BLSA) sample size: AD (n=15), CN (n=8); Religious Orders Study (ROS) sample size: AD (n=31), CN (n=22).

## Supplementary Figure 1. Cohort-specific linear associations between metabolite concentration and disease status

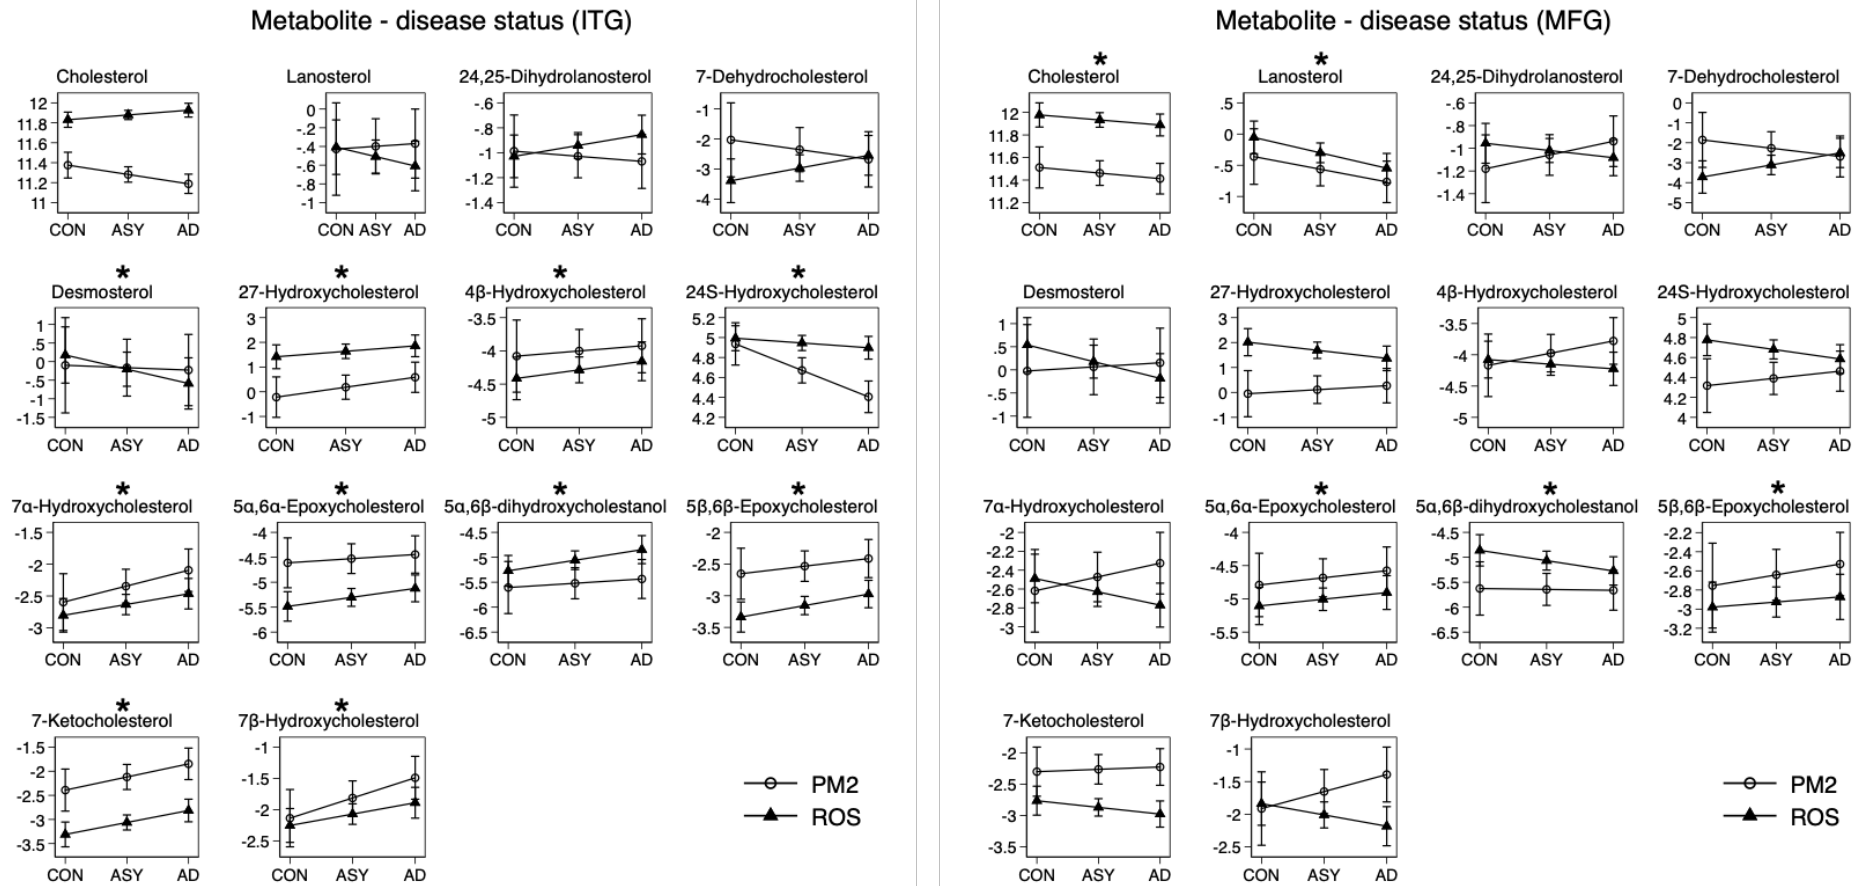

Alzheimer's disease (AD); Cognitively normal (CN); Asymptomatic AD (ASY); Inferior Temporal Gyrus (ITG); Middle Frontal Gyrus (MFG)

Convergent associations – where linear associations between metabolite concentration and disease status/ pathology in ROS and BLSA were in a similar direction – were pooled and indicated with a “\*”. For primary analyses (Table 1), linear mixed effects models were used for each of three a-priori-defined biochemical pathways (i.e. clusters): *de novo* cholesterol biosynthesis, cholesterol catabolism (enzymatic) and cholesterol catabolism (non-enzymatic). At least two metabolites indicated with a \* within each cluster were required in order to run models; clusters where only one metabolite could be pooled are presented within cohort (i.e. study) specific secondary analyses (Supplementary Table 1). Error bars indicate 95% confidence intervals. Baltimore Longitudinal Study on Aging (BLSA) sample size: AD (n=15), CN (n=8); Religious Orders Study (ROS) sample size: AD (n=31), CN (n=22).

## Supplementary Figure 2. Cohort-specific linear associations between metabolite concentration and neuritic plaques (CERAD score)

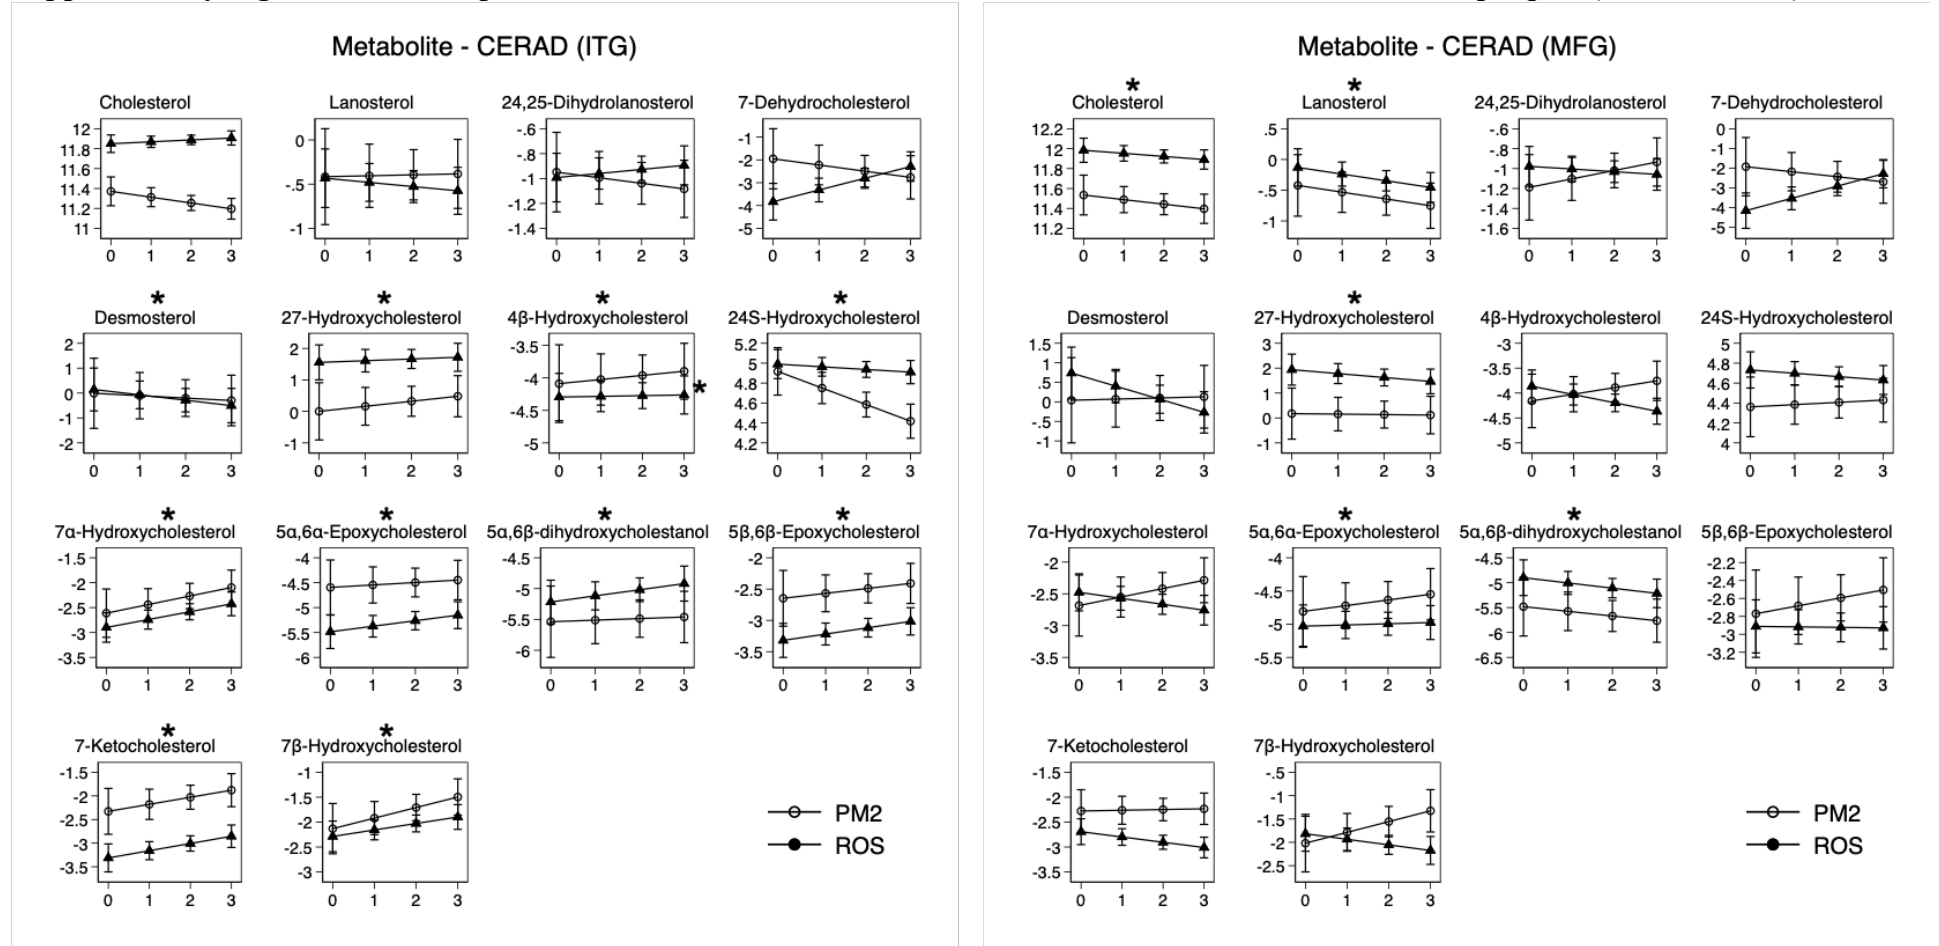

Alzheimer's disease (AD); Cognitively normal (CN); Asymptomatic AD (ASY); Inferior Temporal Gyrus (ITG); Middle Frontal Gyrus (MFG)  
 Convergent associations – where linear associations between metabolite concentration and disease status/ pathology in ROS and BLSA were in a similar direction – were pooled and indicated with a “\*”. For primary analyses (Table 1), linear mixed effects models were used for each of three a-priori-defined biochemical pathways (i.e. clusters): *de novo* cholesterol biosynthesis, cholesterol catabolism (enzymatic) and cholesterol catabolism (non-enzymatic). At least two metabolites indicated with a \* within each cluster were required in order to run models; clusters where only one metabolite could be pooled are presented within cohort (i.e. study) specific secondary analyses (Supplementary Table 1). Error bars indicate 95% confidence intervals. Baltimore Longitudinal Study on Aging (BLSA) sample size: AD (n=15), CN (n=8); Religious Orders Study (ROS) sample size: AD (n=31), CN (n=22).

### Supplementary Figure 3. Cohort-specific linear associations between metabolite concentration and neurofibrillary tangle pathology (Braak score)

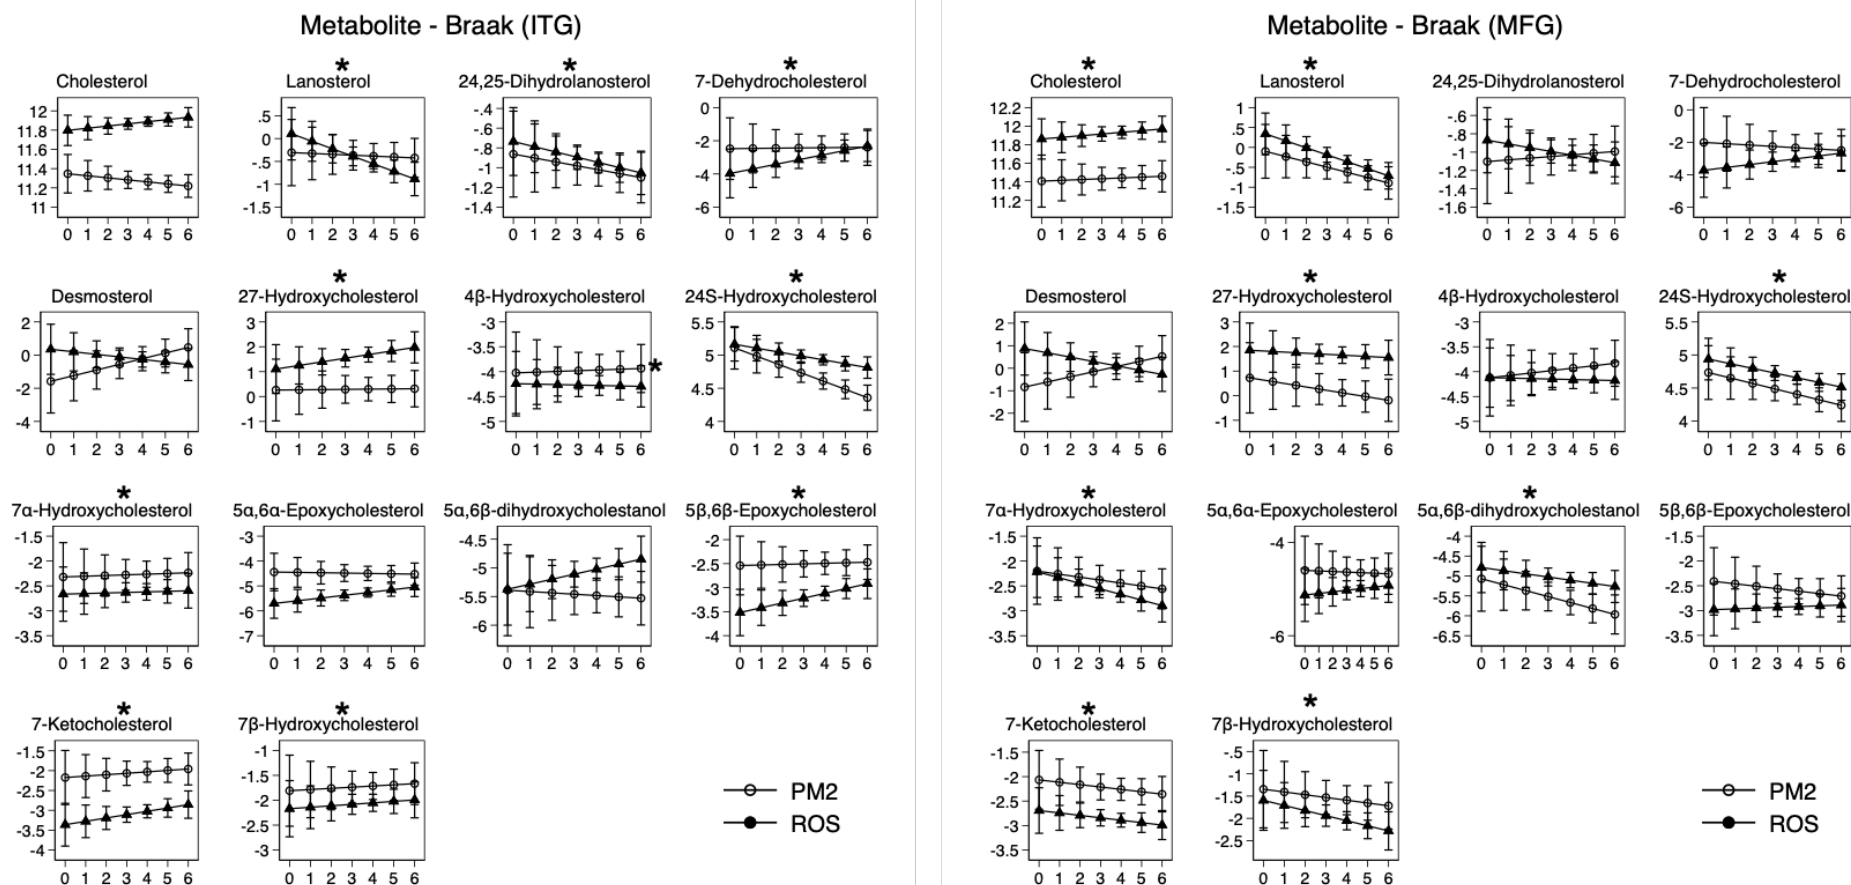

Alzheimer's disease (AD); Cognitively normal (CN); Asymptomatic AD (ASY); Inferior Temporal Gyrus (ITG); Middle Frontal Gyrus (MFG)

Convergent associations – where linear associations between metabolite concentration and disease status/ pathology in ROS and BLSA were in a similar direction – were pooled and indicated with a “\*”. For primary analyses (Table 1), linear mixed effects models were used for each of three a-priori-defined biochemical pathways (i.e. clusters): *de novo* cholesterol biosynthesis, cholesterol catabolism (enzymatic) and cholesterol catabolism (non-enzymatic). At least two metabolites indicated with a \* within each cluster were required in order to run models; clusters where only one metabolite could be pooled are presented within cohort (i.e. study) specific secondary analyses (Supplementary Table

1). Error bars indicate 95% confidence intervals. Baltimore Longitudinal Study on Aging (BLSA) sample size: AD (n=15), CN (n=8); Religious Orders Study (ROS) sample size: AD (n=31), CN (n=22).
